# Supplementary material for: Recombinations, chains and caps: resolving problems with the DCJ-indel model
Source: Springer Nature journal article supplement (doi:10.1186/s13015-024-00253-7), 2024-02-27
Supplement: 13015_2024_253_MOESM1_ESM.pdf [file 13015_2024_253_MOESM1_ESM.pdf]

## Appendix B Supplementary Figures and Tables for Subsection 3.1

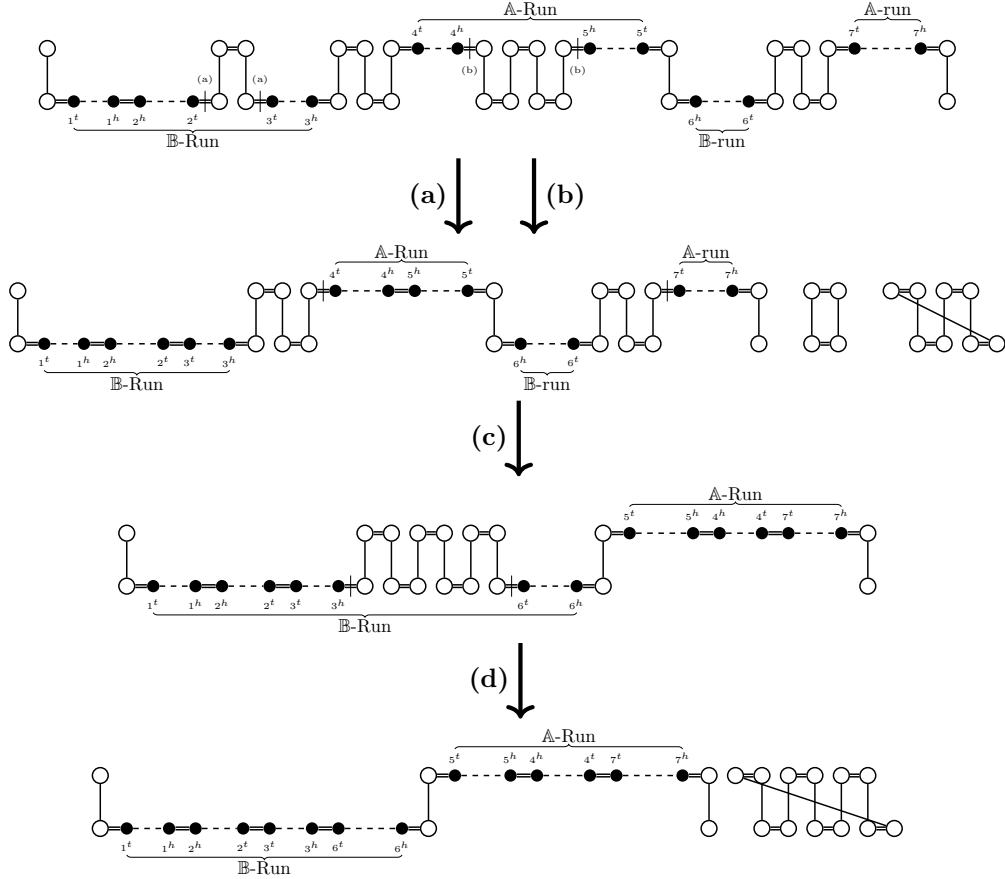

**Fig. B1:** Safe internal operations ((a) to (d)) in a bridge of type  $P_{A|b}, P_{a|b}, P_{B|a}$  “accumulate” elements of a run ((a),(b) and (d)) or “cut in between runs” reducing their number by 2 as described in [11]. In the end, only the components  $P_{A|b}, P_{a|b}$  and  $P_{B|a}$  are not yet handled. Note also that the same sorting can be achieved after a completion as in Figure B2.

**Table B2:** The indel potential from [11] corresponds to the term  $\tilde{P}$  in our distance formula if considered for a single bridge. Bridges with an odd number of extremities per genomes (i.e. odd bridges) were padded with an odd viaduct of length 1.

| Path in [11] | $\Lambda(c)$ | $\lambda(c) - \frac{p_c}{2}$ in [11]                         | Bridge $X$ in reduced notation | $p_{a b}(X)$ | $\max(p_{A a}, p_{B a})(X)$ | $\max(p_{A b}, p_{B b})(X)$ | $-p_{A B}(X)$ | $\tilde{P}(X)$                                           |
|--------------|--------------|--------------------------------------------------------------|--------------------------------|--------------|-----------------------------|-----------------------------|---------------|----------------------------------------------------------|
| AAA          | $k$ odd      | $\left\lceil \frac{k+1}{2} \right\rceil - 0 = \frac{k+1}{2}$ | $P_{A a}, P_{A a}$             | $k-1$        | 2                           | 0                           | 0             | $\left\lceil \frac{k+1}{2} \right\rceil = \frac{k+1}{2}$ |
| AAAB         | $k$ even     | $\left\lceil \frac{k+1}{2} \right\rceil - 0 = \frac{k+2}{2}$ | $P_{A a}, P_{a b}, P_{A b}$    | $k-1$        | 1                           | 1                           | 0             | $\left\lceil \frac{k+1}{2} \right\rceil = \frac{k+2}{2}$ |
| AAAB         | $k$ odd      | $\left\lceil \frac{k+1}{2} \right\rceil - 0 = \frac{k+1}{2}$ | $P_{A b}, P_{A b}$             | $k-1$        | 1                           | 1                           | 0             | $\left\lceil \frac{k+1}{2} \right\rceil = \frac{k+1}{2}$ |
| ABA          | $k$ odd      | $\left\lceil \frac{k+1}{2} \right\rceil - 1 = \frac{k-1}{2}$ | $(P_{A a}), (P_{B a})$         | $k-1$        | 1                           | 0                           | -1            | $\left\lceil \frac{k-1}{2} \right\rceil = \frac{k-1}{2}$ |
| ABAAB        | $k$ even     | $\left\lceil \frac{k+1}{2} \right\rceil - 1 = \frac{k}{2}$   | $P_{A a}, P_{a b}, P_{B b}$    | $k-1$        | 1                           | 1                           | -1            | $\left\lceil \frac{k}{2} \right\rceil = \frac{k}{2}$     |
| ABAAB        | $k$ even     | $\left\lceil \frac{k+1}{2} \right\rceil - 1 = \frac{k}{2}$   | $P_{A b}, P_{a b}, P_{B a}$    | $k-1$        | 1                           | 1                           | -1            | $\left\lceil \frac{k}{2} \right\rceil = \frac{k}{2}$     |
| ABAB         | $k$ odd      | $\left\lceil \frac{k+1}{2} \right\rceil - 1 = \frac{k-1}{2}$ | $(P_{A b}), (P_{B b})$         | $k-1$        | 0                           | 1                           | -1            | $\left\lceil \frac{k-1}{2} \right\rceil = \frac{k-1}{2}$ |
| BBA          | $k$ odd      | $\left\lceil \frac{k+1}{2} \right\rceil - 0 = \frac{k+1}{2}$ | $P_{B a}, P_{B a}$             | $k-1$        | 2                           | 0                           | 0             | $\left\lceil \frac{k+1}{2} \right\rceil = \frac{k+1}{2}$ |
| BBAB         | $k$ even     | $\left\lceil \frac{k+1}{2} \right\rceil - 0 = \frac{k+2}{2}$ | $P_{B a}, P_{a b}, P_{B b}$    | $k-1$        | 1                           | 1                           | 0             | $\left\lceil \frac{k+1}{2} \right\rceil = \frac{k+2}{2}$ |
| BBAB         | $k$ odd      | $\left\lceil \frac{k+1}{2} \right\rceil - 0 = \frac{k+1}{2}$ | $P_{B b}, P_{B b}$             | $k-1$        | 0                           | 2                           | 0             | $\left\lceil \frac{k+1}{2} \right\rceil = \frac{k+1}{2}$ |

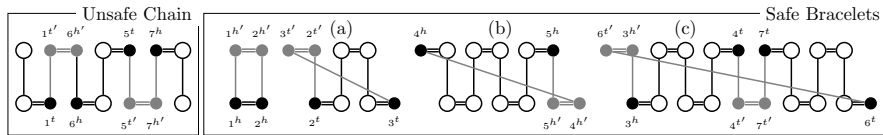

**Fig. B2:** Forming bracelets and chains (as in [5]) from the components of the bridge of type  $P_{A|b}, P_{a|b}, P_{B|a}$  of Figure B1 leaves only  $P_{A|b}, P_{a|b}$  and  $P_{B|a}$  in an unsafe chain. Note how bracelets (a),(b) and (c) create exactly the same adjacencies as part of indel groups as operations (a),(b) and (c) in Figure B1 respectively.

**Table B3:** Path Recombinations used in Recombination Groups as listed in Tables 1 and 2 of [11] are explained by safe operations between unsaturated components. The concrete effect on the distance as opposed to a separate sorting is explained by the differences of  $\tilde{P}$  in two graphs containing the respective sources separately as opposed to one graph containing both. Paddings are administered as in Table B2.

| Source 1 | Bridge $X_1$                       | $\tilde{P}(X_1)$  | Source 2 | Bridge $X_2$                       | $\tilde{P}_2(X_2)$ | Safe operation(s)                                                                                           | Uns. Comp.                                         | $\tilde{P}(X_1 \cup X_2)$ | $\Delta \tilde{P}$ |
|----------|------------------------------------|-------------------|----------|------------------------------------|--------------------|-------------------------------------------------------------------------------------------------------------|----------------------------------------------------|---------------------------|--------------------|
| AAAB     | $P_{A_{ooa}}, P_{a b}, P_{A b}$    | $\frac{k_1+2}{2}$ | BBAB     | $P_{B a}, P_{a b}, P_{B_{ob}}$     | $\frac{k_2+2}{2}$  | $P_{A_{ooa}}, P_{B a} \rightarrow P_{A B}, P_{a_{ooa}}, P_{a b}, P_{a b} \rightarrow P_{A B}, P_{B_{ob}}$   | -                                                  | $\frac{k_1+k_2}{2}$       | -2                 |
| AAA      | $P_{A_{ooa}}, P_{A_{ooa}}$         | $\frac{k_1+1}{2}$ | BBAB     | $P_{B a}, P_{a b}, P_{B_{ob}}$     | $\frac{k_2+2}{2}$  | $P_{A_{ooa}}, P_{B a} \rightarrow P_{A B}, P_{a_{ooa}}$                                                     | $P_{A_{ooa}}, P_{a b}, P_{B_{ob}}$                 | $\frac{k_1+k_2+1}{2}$     | -1                 |
| BBA      | $P_{B a}, P_{B a}$                 | $\frac{k_1+1}{2}$ | AAAB     | $P_{A_{ooa}}, P_{a b}, P_{A b}$    | $\frac{k_2+2}{2}$  | $P_{A_{ooa}}, P_{B a} \rightarrow P_{A B}, P_{a_{ooa}}$                                                     | $P_{B a}, P_{a b}, P_{A b}$                        | $\frac{k_1+k_2+1}{2}$     | -1                 |
| ABA      | $P_{A b}, P_{A b}$                 | $\frac{k_1+1}{2}$ | BBAB     | $P_{B a}, P_{a b}, P_{B_{ob}}$     | $\frac{k_2+2}{2}$  | $P_{A b}, P_{B_{ob}} \rightarrow P_{A B}, P_{B_{ob}}$                                                       | $P_{B a}, P_{a b}, P_{A b}$                        | $\frac{k_1+k_2+1}{2}$     | -1                 |
| BBB      | $P_{B_{ob}}, P_{B_{ob}}$           | $\frac{k_1+1}{2}$ | AAAB     | $P_{A_{ooa}}, P_{a b}, P_{A b}$    | $\frac{k_2+2}{2}$  | $P_{A b}, P_{B_{ob}} \rightarrow P_{A B}, P_{B_{ob}}$                                                       | $P_{A_{ooa}}, P_{a b}, P_{B_{ob}}$                 | $\frac{k_1+k_2+1}{2}$     | -1                 |
| AAA      | $P_{A_{ooa}}, P_{A_{ooa}}$         | $\frac{k_1+1}{2}$ | BBA      | $P_{B a}, P_{B a}$                 | $\frac{k_2+1}{2}$  | $P_{A_{ooa}}, P_{B a} \rightarrow P_{A B}, P_{a_{ooa}}$                                                     | -                                                  | $\frac{k_1+k_2}{2}$       | -1                 |
| AAB      | $P_{A b}, P_{A b}$                 | $\frac{k_1+1}{2}$ | BBB      | $P_{B_{ob}}, P_{B_{ob}}$           | $\frac{k_2+1}{2}$  | $P_{A b}, P_{B_{ob}} \rightarrow P_{A B}, P_{B_{ob}}$                                                       | -                                                  | $\frac{k_1+k_2}{2}$       | -1                 |
| AAAB     | $P_{A_{ooa}}, P_{a b}, P_{A b}$    | $\frac{k_1+2}{2}$ | AAAB     | $P_{A_{ooa}}, P_{a b}, P_{A b}$    | $\frac{k_2+2}{2}$  | $P_{a b}, P_{a b} \rightarrow P_{a_{ooa}}, P_{B_{ob}}$                                                      | $P_{A_{ooa}}, P_{A_{ooa}}, P_{A b}, P_{A b}$       | $\frac{k_1+k_2+2}{2}$     | -1                 |
| BBAB     | $P_{B a}, P_{a b}, P_{B_{ob}}$     | $\frac{k_1+2}{2}$ | BBAB     | $P_{B a}, P_{a b}, P_{B_{ob}}$     | $\frac{k_2+2}{2}$  | $P_{a b}, P_{a b} \rightarrow P_{a_{ooa}}, P_{B_{ob}}$                                                      | $P_{B a}, P_{B a}, P_{B_{ob}}, P_{B_{ob}}$         | $\frac{k_1+k_2+2}{2}$     | -1                 |
| AAAB     | $P_{A_{ooa}}, P_{a b}, P_{A b}$    | $\frac{k_1+2}{2}$ | ABAB     | $P_{A_{ooa}}, P_{a b}, P_{B_{ob}}$ | $\frac{k_2}{2}$    | $P_{a b}, P_{a b} \rightarrow P_{a_{ooa}}, P_{B_{ob}}, P_{A b}, P_{B_{ob}} \rightarrow P_{A B}, P_{B_{ob}}$ | $P_{A_{ooa}}, P_{A_{ooa}}$                         | $\frac{k_1+k_2}{2}$       | -1                 |
| AAAB     | $P_{A_{ooa}}, P_{a b}, P_{A b}$    | $\frac{k_1+2}{2}$ | ABBA     | $P_{A b}, P_{a b}, P_{B a}$        | $\frac{k_2}{2}$    | $P_{A_{ooa}}, P_{B a} \rightarrow P_{A B}, P_{a_{ooa}}, P_{a b}, P_{a b} \rightarrow P_{A B}, P_{B_{ob}}$   | $P_{A b}, P_{A b}$                                 | $\frac{k_1+k_2}{2}$       | -1                 |
| BBAB     | $P_{B a}, P_{a b}, P_{B_{ob}}$     | $\frac{k_1+2}{2}$ | ABAB     | $P_{A_{ooa}}, P_{a b}, P_{B_{ob}}$ | $\frac{k_2}{2}$    | $P_{A_{ooa}}, P_{B a} \rightarrow P_{A B}, P_{a_{ooa}}, P_{a b}, P_{a b} \rightarrow P_{A B}, P_{B_{ob}}$   | $P_{B_{ob}}, P_{B_{ob}}$                           | $\frac{k_1+k_2}{2}$       | -1                 |
| BBAB     | $P_{B a}, P_{a b}, P_{B_{ob}}$     | $\frac{k_1+2}{2}$ | ABBA     | $P_{A b}, P_{a b}, P_{B a}$        | $\frac{k_2}{2}$    | $P_{a b}, P_{a b} \rightarrow P_{a_{ooa}}, P_{B_{ob}}, P_{A b}, P_{B_{ob}} \rightarrow P_{A B}, P_{B_{ob}}$ | $P_{B a}, P_{B a}$                                 | $\frac{k_1+k_2}{2}$       | -1                 |
| ABAB     | $P_{A_{ooa}}, P_{a b}, P_{B_{ob}}$ | $\frac{k_1}{2}$   | ABBA     | $P_{A b}, P_{a b}, P_{B a}$        | $\frac{k_2}{2}$    | $P_{A_{ooa}}, P_{B a} \rightarrow P_{A B}, P_{a_{ooa}}, P_{a b}, P_{a b} \rightarrow P_{A B}, P_{B_{ob}}$   | -                                                  | $\frac{k_1+k_2-2}{2}$     | -1                 |
| AAA      | $P_{A_{ooa}}, P_{A_{ooa}}$         | $\frac{k_1+1}{2}$ | ABBA     | $P_{A b}, P_{a b}, P_{B a}$        | $\frac{k_2}{2}$    | $P_{A_{ooa}}, P_{B a} \rightarrow P_{A B}, P_{a_{ooa}}$                                                     | $P_{A_{ooa}}, P_{a b}, P_{A b}$                    | $\frac{k_1+k_2+1}{2}$     | 0                  |
| AAB      | $P_{A b}, P_{A b}$                 | $\frac{k_1+1}{2}$ | ABAB     | $P_{A_{ooa}}, P_{a b}, P_{B_{ob}}$ | $\frac{k_2}{2}$    | $P_{A b}, P_{B_{ob}} \rightarrow P_{A B}, P_{B_{ob}}$                                                       | $P_{A_{ooa}}, P_{a b}, P_{A b}$                    | $\frac{k_1+k_2+1}{2}$     | 0                  |
| BBA      | $P_{B a}, P_{B a}$                 | $\frac{k_1+1}{2}$ | ABAB     | $P_{A_{ooa}}, P_{a b}, P_{B_{ob}}$ | $\frac{k_2}{2}$    | $P_{A_{ooa}}, P_{B a} \rightarrow P_{A B}, P_{a_{ooa}}$                                                     | $P_{B a}, P_{a b}, P_{B_{ob}}$                     | $\frac{k_1+k_2+1}{2}$     | 0                  |
| BBB      | $P_{B_{ob}}, P_{B_{ob}}$           | $\frac{k_1+1}{2}$ | ABBA     | $P_{A b}, P_{a b}, P_{B a}$        | $\frac{k_2}{2}$    | $P_{A b}, P_{B_{ob}} \rightarrow P_{A B}, P_{B_{ob}}$                                                       | $P_{B a}, P_{a b}, P_{B_{ob}}$                     | $\frac{k_1+k_2+1}{2}$     | 0                  |
| AAA      | $P_{A_{ooa}}, P_{A_{ooa}}$         | $\frac{k_1+1}{2}$ | BBB      | $P_{B_{ob}}, P_{B_{ob}}$           | $\frac{k_2+1}{2}$  | $P_{A_{ooa}}, P_{B_{ob}} \rightarrow P_{A B}, P_{B_{ob}}$                                                   | $P_{A_{ooa}}, P_{A_{ooa}}, P_{B_{ob}}, P_{B_{ob}}$ | $\frac{k_1+k_2+2}{2}$     | 0                  |
| AAB      | $P_{A b}, P_{A b}$                 | $\frac{k_1+1}{2}$ | BBA      | $P_{B a}, P_{B a}$                 | $\frac{k_2+1}{2}$  | $P_{a b}, P_{a b} \rightarrow P_{a_{ooa}}, P_{B_{ob}}$                                                      | $P_{B a}, P_{B a}, P_{A b}, P_{A b}$               | $\frac{k_1+k_2+2}{2}$     | 0                  |
| ABAB     | $P_{A_{ooa}}, P_{a b}, P_{B_{ob}}$ | $\frac{k_1}{2}$   | ABAB     | $P_{A_{ooa}}, P_{a b}, P_{B_{ob}}$ | $\frac{k_2}{2}$    | $P_{a b}, P_{a b} \rightarrow P_{a_{ooa}}, P_{B_{ob}}$                                                      | $P_{A_{ooa}}, P_{A_{ooa}}, P_{B_{ob}}, P_{B_{ob}}$ | $\frac{k_1+k_2}{2}$       | 0                  |
| ABBA     | $P_{A b}, P_{a b}, P_{B a}$        | $\frac{k_1}{2}$   | ABBA     | $P_{A b}, P_{a b}, P_{B a}$        | $\frac{k_2}{2}$    | $P_{a b}, P_{a b} \rightarrow P_{a_{ooa}}, P_{B_{ob}}$                                                      | $P_{B a}, P_{B a}, P_{A b}, P_{A b}$               | $\frac{k_1+k_2}{2}$       | 0                  |

**Table B4:** Recombination groups from [11] can be facilitated entirely by safe operations. In all but 4 cases, resultants either contain no further unsaturated components or if so, no further safe operations are available on the unsaturated components as a bridge containing the respective partner would have been used in an operation higher in the table (last column). Exceptions are the groups  $S4, S5, S6, S7$  (marked with star). In these cases, the resultant  $AB_{AB}$  ( $AB_{BA}$ ) could still be safely recombined with  $AB_{AB}$  ( $AB_{BA}$ ), but this recombination is only neutral (see Table B3).

|     | Sources                    | Reusable Resultants |            |            | Unsat. after safe internal ops. |            |                | Unsat. after all safe ops. in group |                |       | No partner due to |
|-----|----------------------------|---------------------|------------|------------|---------------------------------|------------|----------------|-------------------------------------|----------------|-------|-------------------|
|     |                            | $A\alpha\alpha$     | $B \alpha$ | $\alpha b$ | $A b$                           | $B\circ b$ | $A\circ\alpha$ | $B \alpha$                          | $P_{\alpha b}$ | $A b$ |                   |
| $P$ |                            |                     |            |            |                                 |            |                |                                     |                |       |                   |
| 1   | $AA_{AB} + BB_{AB}$        | 1                   | 1          | 2          | 1                               | 1          | 0              | 0                                   | 0              | 0     | 0                 |
| $Q$ |                            |                     |            |            |                                 |            |                |                                     |                |       |                   |
| 1   | $2AA_{AB} + BB_A + BB_B$   | 2                   | 2          | 2          | 2                               | 2          | 0              | 0                                   | 0              | 0     | 0                 |
| 2   | $2BB_{AB} + AA_A + AA_B$   | 2                   | 2          | 2          | 2                               | 2          | 0              | 0                                   | 0              | 0     | 0                 |
| $T$ |                            |                     |            |            |                                 |            |                |                                     |                |       |                   |
| 1   | $AA_{AB} + BB_A + AB_{AB}$ | 2                   | 2          | 2          | 1                               | 1          | 0              | 0                                   | 0              | 0     | 0                 |
| 2   | $AA_{AB} + BB_B + AB_{BA}$ | 1                   | 1          | 2          | 2                               | 2          | 0              | 0                                   | 0              | 0     | 0                 |
| 3   | $BB_{AB} + AA_A + AB_{BA}$ | 2                   | 2          | 2          | 1                               | 1          | 0              | 0                                   | 0              | 0     | 0                 |
| 4   | $BB_{AB} + AA_B + AB_{AB}$ | 1                   | 1          | 2          | 2                               | 2          | 0              | 0                                   | 0              | 0     | 0                 |
| 5   | $2AA_{AB} + BB_A$          | 2                   | 2          | 2          | 2                               | 2          | 0              | 0                                   | 0              | 2     | 0                 |
| 6   | $2AA_{AB} + BB_B$          | 2                   | 0          | 2          | 2                               | 2          | 2              | 0                                   | 0              | 0     | 0                 |
| 7   | $2BB_{AB} + AA_A$          | 2                   | 2          | 2          | 2                               | 0          | 2              | 0                                   | 0              | 2     | 2                 |
| 8   | $2BB_{AB} + AA_B$          | 0                   | 2          | 2          | 2                               | 2          | 0              | 2                                   | 0              | 0     | 0                 |
| $S$ |                            |                     |            |            |                                 |            |                |                                     |                |       |                   |
| 1   | $AA_A + BB_A$              | 2                   | 2          | 0          | 0                               | 0          | 0              | 0                                   | 0              | 0     | 0                 |
| 2   | $AA_B + BB_B$              | 0                   | 0          | 0          | 2                               | 2          | 0              | 0                                   | 0              | 0     | 0                 |
| 3   | $AB_{AB} + AB_{BA}$        | 1                   | 1          | 2          | 1                               | 1          | 0              | 0                                   | 0              | 0     | 0                 |
| 4   | $AA_{AB} + BB_A$           | 1                   | 2          | 1          | 1                               | 0          | 0              | 1                                   | 1              | 1     | 0                 |
| 5   | $AA_{AB} + BB_B$           | 1                   | 0          | 1          | 1                               | 2          | 1              | 0                                   | 1              | 0     | 1                 |
| 6   | $BB_{AB} + AA_A$           | 2                   | 1          | 1          | 0                               | 1          | 1              | 0                                   | 1              | 0     | 1                 |
| 7   | $BB_{AB} + AA_B$           | 0                   | 1          | 1          | 2                               | 1          | 0              | 1                                   | 1              | 1     | 0                 |
| 8   | $AA_{AB} + AB_{AB}$        | 2                   | 0          | 2          | 1                               | 1          | 2              | 0                                   | 0              | 0     | 0                 |
| 9   | $AA_{AB} + AB_{BA}$        | 1                   | 1          | 2          | 2                               | 0          | 0              | 0                                   | 0              | 2     | 0                 |
| 10  | $BB_{AB} + AB_{AB}$        | 1                   | 1          | 2          | 0                               | 2          | 0              | 0                                   | 0              | 0     | 2                 |
| 11  | $BB_{AB} + AB_{BA}$        | 0                   | 2          | 2          | 1                               | 1          | 0              | 2                                   | 0              | 0     | 0                 |
| 12  | $2AA_{AB}$                 | 2                   | 0          | 2          | 2                               | 0          | 2              | 0                                   | 0              | 2     | 0                 |
| 13  | $2BB_{AB}$                 | 0                   | 2          | 2          | 0                               | 2          | 0              | 2                                   | 0              | 0     | 2                 |
| $M$ |                            |                     |            |            |                                 |            |                |                                     |                |       |                   |
| 1   | $2AB_{AB} + AA_B + BB_A$   | 2                   | 2          | 2          | 2                               | 2          | 0              | 0                                   | 0              | 0     | 0                 |
| 2   | $2AB_{BA} + AA_A + BB_B$   | 2                   | 2          | 2          | 2                               | 2          | 0              | 0                                   | 0              | 0     | 0                 |
| $N$ |                            |                     |            |            |                                 |            |                |                                     |                |       |                   |
| 1   | $AB_{AB} + AA_B + BB_A$    | 1                   | 2          | 1          | 2                               | 1          | 0              | 1                                   | 1              | 1     | 0                 |
| 2   | $AB_{BA} + AA_A + BB_B$    | 2                   | 1          | 1          | 1                               | 2          | 1              | 0                                   | 1              | 0     | 1                 |
| 3   | $2AB_{AB} + AA_B$          | 2                   | 0          | 2          | 2                               | 2          | 2              | 0                                   | 0              | 0     | 0                 |
| 4   | $2AB_{AB} + BB_A$          | 2                   | 2          | 2          | 0                               | 2          | 0              | 0                                   | 0              | 0     | 2                 |
| 5   | $2AB_{BA} + AA_A$          | 2                   | 2          | 2          | 2                               | 0          | 0              | 0                                   | 0              | 2     | 0                 |
| 6   | $2AB_{BA} + BB_B$          | 0                   | 2          | 2          | 2                               | 2          | 0              | 2                                   | 0              | 0     | 0                 |

$P_{A|b} \rightarrow T1, Q1, P1;$   
 $P_{A\alpha\alpha} \rightarrow T2, Q1, P1;$   
 $P_{B\circ b} \rightarrow Q2, P1, T3;$   
 $P_{B|\alpha} \rightarrow Q2, P1, T4;$

$P_{B|\alpha} \rightarrow S1, T5, T1;$   
 $\star P_{\alpha|b} \rightarrow T5, T1, P1;$   
 $\star P_{A|b} \rightarrow T1, P1;$   
 $P_{A\alpha\alpha} \rightarrow T2, S4, P1;$   
 $\star P_{\alpha|b} \rightarrow T6, T2, P1;$   
 $P_{B\circ b} \rightarrow S2, T6, T2;$   
 $P_{A\alpha\alpha} \rightarrow T3, S1, T7;$   
 $\star P_{\alpha|b} \rightarrow P1, T3, T7;$   
 $\star P_{B\circ b} \rightarrow P1, T3;$   
 $P_{B|\alpha} \rightarrow S6, P1, T4;$   
 $\star P_{\alpha|b} \rightarrow P1, T4, T8;$   
 $P_{A|b} \rightarrow T4, S2, T8;$   
 $P_{A\alpha\alpha} \rightarrow S3, T1, P1;$   
 $P_{A|b} \rightarrow S3, T2, P1;$   
 $P_{B\circ b} \rightarrow T4, P1, S3;$   
 $P_{B|\alpha} \rightarrow T3, P1, S3;$   
 $P_{A\alpha\alpha} \rightarrow S9, T5, P1;$   
 $P_{A|b} \rightarrow S8, T6, P1;$   
 $P_{B|\alpha} \rightarrow T7, P1, S10;$   
 $P_{B\circ b} \rightarrow T8, P1, S11;$

$P_{B|\alpha} \rightarrow S1, T1, M1;$   
 $P_{\alpha|b} \rightarrow T1, M1, S3, T4;$   
 $P_{A|b} \rightarrow M1, S2, T4;$   
 $P_{A\alpha\alpha} \rightarrow M2, S1, T3;$   
 $P_{\alpha|b} \rightarrow T2, S3, M2, T3;$   
 $P_{B\circ b} \rightarrow S2, T2, M2;$   
 $P_{A\alpha\alpha} \rightarrow S3, M1, T4;$   
 $P_{B\circ b} \rightarrow M1, T1, S3;$   
 $P_{A|b} \rightarrow S3, M2, T3;$   
 $P_{B|\alpha} \rightarrow M2, T2, S3;$

## Appendix C Additional Performance Test Data

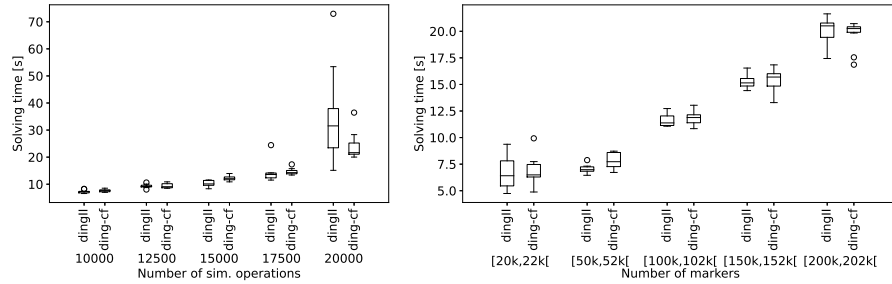

**Fig. C3:** `dingII` and `ding-cf` evaluated on simulated genomes with the same parameters as described in Section 5 with a single linear chromosome as the root genome. On the left, the number of simulated operations is increased from 10,000 to 20,000 in steps of 2500. On the right, the number of markers is increased from 10,000 and 2500 to 100,000 in steps of 25,000.

The further performance test data of Figure C3 indicates that `ding-cf` behaves similarly as `ding` regarding the number of operations and markers (compare to [7]), even outperforming `ding` on harder problem instances. The outliers for the smallest number of markers in Figure C3 indicates that the number of operations alone might not be such a significant factor, but rather the number of operations relative to the size of the genome.

## Appendix D Supplementary Drosophila data

**Table D5:** Statistics about drosophila genomes after processing to unimog format.

| Taxon                  | Assembly        | #markers | #lin. chrom. | # circ. chrom. |
|------------------------|-----------------|----------|--------------|----------------|
| <i>D. ananassae</i>    | GCF_017639315.1 | 13838    | 100          | 0              |
| <i>D. erecta</i>       | GCF_003286155.1 | 12898    | 52           | 0              |
| <i>D. grimshawi</i>    | GCF_018153295.1 | 12108    | 41           | 0              |
| <i>D. melanogaster</i> | GCF_000001215.4 | 13083    | 11           | 1              |
| <i>D. mojavensis</i>   | GCF_018153725.1 | 12464    | 35           | 0              |
| <i>D. persimilis</i>   | GCF_003286085.1 | 13630    | 211          | 0              |
| <i>D. sechellia</i>    | GCF_004382195.1 | 13189    | 76           | 0              |
| <i>D. simulans</i>     | GCF_016746395.2 | 13336    | 32           | 0              |
| <i>D. virilis</i>      | GCF_003285735.1 | 12821    | 131          | 0              |
| <i>D. willistoni</i>   | GCF_018902025.1 | 13901    | 357          | 0              |
| <i>D. yakuba</i>       | GCF_016746365.2 | 13306    | 26           | 1              |

**Table D6:** Statistics of all pairwise *ding-cf* runs with *lr* the number of linear, *cr* the number of circular chromosomes, *mxfam* the size of the largest family, *#ambf* the number of ambiguous families, *# amb* average number of markers of ambiguous families and *N* the total number of markers.

| Pair                                 | <i>lr</i> | <i>cr</i> | <i>mxfam</i> | <i>#ambf</i> | <i>#amb</i> | <i>N</i> | <i>dist</i> | <i>gap</i> | <i>time</i> |
|--------------------------------------|-----------|-----------|--------------|--------------|-------------|----------|-------------|------------|-------------|
| <i>D. ananassae-D. erecta</i>        | 152       | 0         | 22           | 783          | 1660        | 26736    | 2914        | 0.4461%    | 43200.24    |
| <i>D. ananassae-D. grimshawi</i>     | 141       | 0         | 20           | 831          | 1679        | 25946    | 4363        | 0.2292%    | 43200.24    |
| <i>D. ananassae-D. melanogaster</i>  | 111       | 1         | 25           | 752          | 1679        | 26921    | 2875        | 0.8696%    | 43200.06    |
| <i>D. ananassae-D. mojavensis</i>    | 135       | 0         | 50           | 832          | 1736.5      | 26302    | 4369        | 0.2289%    | 43200.25    |
| <i>D. ananassae-D. persimilis</i>    | 311       | 0         | 29           | 1073         | 2284.5      | 27468    | 3903        | 0.5380%    | 43200.31    |
| <i>D. ananassae-D. sechellia</i>     | 176       | 0         | 49           | 808          | 1756.5      | 27027    | 3001        | 0.1333%    | 43200.28    |
| <i>D. ananassae-D. simulans</i>      | 132       | 0         | 20           | 789          | 1783        | 27174    | 2999        | 0.9003%    | 43200.26    |
| <i>D. ananassae-D. virilis</i>       | 231       | 0         | 20           | 1023         | 2051.5      | 26659    | 4407        | 0.4538%    | 43200.27    |
| <i>D. ananassae-D. willistoni</i>    | 457       | 0         | 81           | 997          | 2306.5      | 27739    | 5153        | 0.4463%    | 43200.31    |
| <i>D. ananassae-D. yakuba</i>        | 126       | 1         | 20           | 777          | 1769.5      | 27144    | 3001        | 0.7997%    | 43200.26    |
| <i>D. erecta-D. grimshawi</i>        | 93        | 0         | 22           | 740          | 1454.5      | 25006    | 4243        | 0.0471%    | 43200.25    |
| <i>D. erecta-D. melanogaster</i>     | 63        | 1         | 25           | 621          | 1420        | 25981    | 900         | 0.5556%    | 43200.32    |
| <i>D. erecta-D. mojavensis</i>       | 87        | 0         | 22           | 714          | 1409.5      | 25362    | 4253        | 0.0941%    | 43200.24    |
| <i>D. erecta-D. persimilis</i>       | 263       | 0         | 29           | 983          | 2038        | 26528    | 3715        | 0.1615%    | 43200.32    |
| <i>D. erecta-D. sechellia</i>        | 128       | 0         | 30           | 667          | 1471        | 26087    | 1033        | 0.0000%    | 126.79      |
| <i>D. erecta-D. simulans</i>         | 84        | 0         | 22           | 642          | 1456        | 26234    | 1025        | 0.0976%    | 43200.25    |
| <i>D. erecta-D. virilis</i>          | 183       | 0         | 22           | 925          | 1788.5      | 25719    | 4264        | 0.2111%    | 43200.27    |
| <i>D. erecta-D. willistoni</i>       | 409       | 0         | 22           | 869          | 1796        | 26799    | 5004        | 0.2598%    | 43200.27    |
| <i>D. erecta-D. yakuba</i>           | 78        | 1         | 22           | 619          | 1424        | 26204    | 959         | 0.2086%    | 43200.27    |
| <i>D. grimshawi-D. melanogaster</i>  | 52        | 1         | 25           | 695          | 1428.5      | 25191    | 4211        | 0.3087%    | 43200.24    |
| <i>D. grimshawi-D. mojavensis</i>    | 76        | 0         | 16           | 722          | 1526.5      | 24572    | 2221        | 0.4953%    | 43200.24    |
| <i>D. grimshawi-D. persimilis</i>    | 252       | 0         | 29           | 984          | 2014        | 25738    | 4376        | 0.2514%    | 43200.25    |
| <i>D. grimshawi-D. sechellia</i>     | 117       | 0         | 30           | 745          | 1483        | 25297    | 4313        | 0.0000%    | 367.95      |
| <i>D. grimshawi-D. simulans</i>      | 73        | 0         | 18           | 715          | 1467        | 25444    | 4294        | 0.0932%    | 43200.23    |
| <i>D. grimshawi-D. virilis</i>       | 172       | 0         | 20           | 933          | 1902        | 24929    | 2240        | 0.4911%    | 43200.26    |
| <i>D. grimshawi-D. willistoni</i>    | 398       | 0         | 18           | 885          | 1818.5      | 26009    | 5052        | 0.1584%    | 43200.28    |
| <i>D. grimshawi-D. yakuba</i>        | 67        | 1         | 20           | 707          | 1455        | 25414    | 4267        | 0.1640%    | 43200.24    |
| <i>D. melanogaster-D. mojavensis</i> | 46        | 1         | 25           | 682          | 1409        | 25547    | 4218        | 0.1660%    | 43200.23    |
| <i>D. melanogaster-D. persimilis</i> | 222       | 1         | 29           | 945          | 2035        | 26713    | 3704        | 0.4320%    | 43200.29    |
| <i>D. melanogaster-D. sechellia</i>  | 87        | 1         | 30           | 604          | 1434.5      | 26272    | 779         | 0.0000%    | 39.53       |
| <i>D. melanogaster-D. simulans</i>   | 43        | 1         | 25           | 581          | 1453        | 26419    | 719         | 0.0000%    | 135.49      |
| <i>D. melanogaster-D. virilis</i>    | 142       | 1         | 25           | 886          | 1769.5      | 25904    | 4278        | 0.1403%    | 43200.29    |
| <i>D. melanogaster-D. willistoni</i> | 368       | 1         | 25           | 831          | 1804.5      | 26984    | 5003        | 0.4197%    | 43200.27    |
| <i>D. melanogaster-D. yakuba</i>     | 37        | 2         | 25           | 589          | 1437.5      | 26389    | 902         | 0.0000%    | 1081.82     |
| <i>D. mojavensis-D. persimilis</i>   | 246       | 0         | 29           | 982          | 2017        | 26094    | 4399        | 0.1137%    | 43200.30    |
| <i>D. mojavensis-D. sechellia</i>    | 111       | 0         | 30           | 729          | 1477.5      | 25653    | 4323        | 0.0000%    | 714.61      |
| <i>D. mojavensis-D. simulans</i>     | 67        | 0         | 19           | 710          | 1482.5      | 25800    | 4321        | 0.1389%    | 43200.27    |
| <i>D. mojavensis-D. virilis</i>      | 166       | 0         | 20           | 886          | 1862.5      | 25285    | 1866        | 0.4823%    | 43200.25    |
| <i>D. mojavensis-D. willistoni</i>   | 392       | 0         | 29           | 883          | 1884.5      | 26365    | 5102        | 0.2940%    | 43200.28    |
| <i>D. mojavensis-D. yakuba</i>       | 61        | 1         | 24           | 688          | 1458.5      | 25770    | 4300        | 0.0465%    | 43200.26    |
| <i>D. persimilis-D. sechellia</i>    | 287       | 0         | 30           | 990          | 2071.5      | 26819    | 3806        | 0.1314%    | 43200.28    |
| <i>D. persimilis-D. simulans</i>     | 243       | 0         | 29           | 958          | 2053.5      | 26966    | 3806        | 0.3153%    | 43200.28    |
| <i>D. persimilis-D. virilis</i>      | 342       | 0         | 29           | 1175         | 2375        | 26451    | 4457        | 0.4936%    | 43200.30    |
| <i>D. persimilis-D. willistoni</i>   | 568       | 0         | 29           | 1144         | 2423.5      | 27531    | 5197        | 0.3848%    | 43200.31    |
| <i>D. persimilis-D. yakuba</i>       | 237       | 1         | 29           | 945          | 2033        | 26936    | 3774        | 0.3180%    | 43200.30    |
| <i>D. sechellia-D. simulans</i>      | 108       | 0         | 30           | 628          | 1547.5      | 26525    | 768         | 0.0000%    | 4328.75     |
| <i>D. sechellia-D. virilis</i>       | 207       | 0         | 30           | 934          | 1812        | 26010    | 4345        | 0.0000%    | 19154.21    |
| <i>D. sechellia-D. willistoni</i>    | 433       | 0         | 30           | 883          | 1878        | 27090    | 5097        | 0.1766%    | 43200.30    |
| <i>D. sechellia-D. yakuba</i>        | 102       | 1         | 30           | 634          | 1492.5      | 26495    | 1075        | 0.0000%    | 466.19      |
| <i>D. simulans-D. virilis</i>        | 163       | 0         | 20           | 912          | 1826.5      | 26157    | 4366        | 0.3436%    | 43200.25    |
| <i>D. simulans-D. willistoni</i>     | 389       | 0         | 29           | 859          | 1891.5      | 27237    | 5114        | 0.3911%    | 43200.28    |
| <i>D. simulans-D. yakuba</i>         | 58        | 1         | 24           | 630          | 1595.5      | 26642    | 1029        | 1.4577%    | 43200.28    |
| <i>D. virilis-D. willistoni</i>      | 488       | 0         | 56           | 1048         | 2185        | 26722    | 5123        | 0.3514%    | 43200.29    |
| <i>D. virilis-D. yakuba</i>          | 157       | 1         | 20           | 890          | 1796        | 26127    | 4336        | 0.2537%    | 43200.29    |
| <i>D. willistoni-D. yakuba</i>       | 383       | 1         | 32           | 849          | 1910        | 27207    | 5085        | 0.5310%    | 43200.25    |

## D.1 Evaluating the Distance Matrix

To estimate the strength of the phylogenetic signal in the obtained distance data of Table D6, we compared it to the path metric of the reconstructed tree, which we give here in Newick format for reference:

```
((((ananassae:1537.6125,(((grimshawi:1095.78125,(mojavensis:915.77777778,
virilis:950.22222222):201.71875):1035.83928571,willistoni:2931.16071429):
309.89583333,persimilis:1948.47916667):396.2625):921.08007813,
erecta:454.70117188):18.54882813,(melanogaster:309.2890625,
(sechellia:398.18359375,simulans:369.81640625):55.7109375):
104.75195313,yakuba:497.74804688);
```

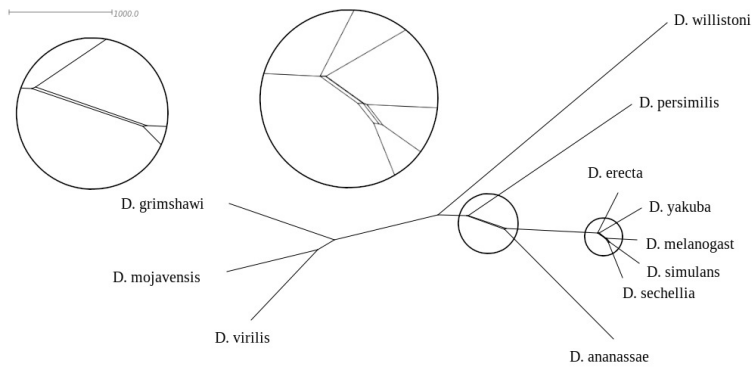

**Fig. D4:** Phylogenetic network generated from the distances in Table D6 by SplitsTree4. The fit calculated by SplitsTree4 was 97.7%.

Calculating the deviation of the distances calculated by `ding-cf` and the tree path metric, we obtain an average of around 0.5% per entry with the largest relative difference being 2% for the distance of *D. melanogaster* and *D. simulans*.

Another way to analyse how well a distance matrix reflects a tree, is to perform a *split decomposition*. In short, a *split* is a generalized tree edge in the sense that it separates one subset of taxa from the rest. It is then possible to decompose the distance matrix into a subset of so-called *d*-splits and a residual matrix containing no further *d*-splits. The way *d*-splits are displayed by SplitsTree is as a set of parallel edges separating one set part of the graph from the other. Most importantly, if a split decomposition is applied to an *additive metric*, that is, the path metric of a unique tree, the only *d*-splits in the resulting network are the edges of that tree. For more information, the interested reader is referred to [15].

We used SplitsTree4 to construct such a splits network and give the output in Figure D4. The resulting network is very tree-like in appearance with all major splits conforming to the tree computed for Figure 14. We provide zoomed in versions of the minor splits displayed by SplitsTree. We see that relative to the “correct” splits with which they conflict, they have far smaller weight. In combination with the computed fit of 97.7% calculated by SplitsTree for this data, we can further confirm that the distances calculated by `ding-cf` are close to being additive on this dataset.

## D.2 Additional Drosophila Diagrams

The matching diagrams for all pairs of the 11 analyzed drosophila can be found here: <https://doi.org/10.6084/m9.figshare.24480892.v1>
